# Supplementary material for: Anticorrosion, Thermal Degradation, and Hydrophobic Performances of Graphene/TiO2 Nanocomposite Coatings
Source: MDPI journal article supplement (doi:10.3390/polym15112428), 2023-05-23
Supplement: s1 [file s1]

Supplementary Information

# Anticorrosion, Thermal Degradation, and Hydrophobic Performances of Graphene/ $TiO_2$ Nanocomposite Coatings

Sachin Sharma Ashok Kumar <sup>1</sup>, Nujud Badawi Mohammed<sup>1</sup>, Osamah Alduhaish <sup>2</sup>, Kasi Ramesh <sup>1,\*</sup>, Subramaniam Ramesh <sup>1</sup>, Mujeeb Khan <sup>2</sup>, Baji Shaik <sup>3</sup> and Syed. F. Adil <sup>2,\*</sup>

<sup>1</sup> Centre for Ionics University of Malaya, Department of Physics, Faculty of Science, Universiti Malaya, Kuala Lumpur 50603, Malaysia; sachinrahulsharma@gmail.com (S.S.A.K.); lyde467@hotmail.com (N.B.M.); ramesh@um.edu.my (S.R.)

<sup>2</sup> Chemistry Department, College of Science, King Saud University, P.O. 2455, Riyadh 11451, Saudi Arabia; oalduhaish@ksu.edu.sa (O.A.); kmujeeb@ksu.edu.sa (M.K.)

<sup>3</sup> School of Chemical Engineering, Yeungnam University, Gyeongsan 38541, Republic of Korea; shaikbaji@yu.ac.kr

\* Correspondence: Author: rameshkasi@um.edu.my (K.R.); sfadil@ksu.edu.sa (S.F.A.)

**Table S1:** Material specifications of acrylic polyol resin (Product Name: Desmophen A 870 BA).

| Material Specifications            | Value       | Unit of measurements |
|------------------------------------|-------------|----------------------|
| Viscosity at 23 °C                 | 3500 ± 700  | mPA.s                |
| Density at 20 °C                   | 1.09        | g/mL                 |
| Hydroxyl content                   | 2.95 ± 0.15 | %                    |
| Butyl acetate - Solvent            |             | -                    |
| Non-volatiles (Solid content wt.%) | 70 ± 1      | %                    |

**Table S2:** Material specifications of NCO curing agent (Product Name: Desmodur N 75 MPA/X).

| Material Specifications                           | Value      | Unit of measurements |
|---------------------------------------------------|------------|----------------------|
| Viscosity at 23 °C                                | 250 ± 75   | mPA.s                |
| Density at 20 °C                                  | 1.07       | $g/cm^3$             |
| NCO content                                       | 16.5 ± 0.3 | %                    |
| Solvent - 1-methoxypropylacetate-<br>2/xylene 1:1 |            | -                    |
| Non-volatiles (Solid content wt.%)                | 75 ± 1     | %                    |

**Table S3:** Material specifications of epoxy resin (Product Name: NPSN-901x75).

| Material Specifications               | Value      | Unit of measurements |
|---------------------------------------|------------|----------------------|
| Viscosity at 25 °C                    | 8000-15000 | mPA.s                |
| Density at 25 °C                      | 1.1        | $g/cm^3$             |
| Epoxy equivalent weight               | 450-500    | g/eq                 |
| Solvent - Xylene                      |            | -                    |
| Non-volatiles (Solid<br>content wt.%) | 74-76      | %                    |
